# Supplementary material
Source: PubMed Central journal article supplement (PMC29381)
Supplement: pnas_98_4_2059__3.pdf [file pnas_98_4_2059__3.pdf]

Pto M G S K Y S K A T N S I N D A L S S S Y L V P F E S Y R V P L V D L E E A T N N 40  
LhirPto M G S K Y S K A T N S I N D A L S S S Y L V P F E S Y R V P L V D L E E A T N N 40  
Fen M G S K Y S K A T N S I N D A S N L S Y G V P F E N Y R V P F V D L E E A T N N 40  
Lhirfen M G S K Y S K A T N S I N D A S N L S Y G V P F E N Y R V P F V D L D E A T N N 40  
LhirPtoD M G T N Y S K P T T S I N D A S N L R N R V P F E S F R V P F V D L Q E A T N N 40  
LhirPtoF M G S K Y S K A T N S I S D A S N S - - - - F E S Y R F P L V D L E E A T N N 35

Pto F D H K F L I G H G V F G K V Y K G V L R D G A K V A L K R R T P E S S Q G I E 80  
LhirPto F D D K F F I G A G V F G K V Y K G V L R D G T K V A L K R R K P E S S Q G I E 80  
Fen F D D N F F I G E G G F G K V Y R G V L R D G T K V A L K K H K P E S S Q G I E 80  
Lhirfen F D D K F F I G E G G F G K V Y R G V L R D G T K V A L K R H N H D S R Q S I K 80  
LhirPtoD F D D K F L I G V G I F G K V Y R G V L R D G T K V A L K R R K P E S P Q G F E 80  
LhirPtoF F D D K F V I G E S G F G K V Y R G V L R D G T K V A L K R H N R D S R E S I E 75

Pto E F E T E I E I T L S F C R H P H L V S L I G F C D E R N E M I L I Y K Y M E N G 120  
LhirPto E F E T E I E I I L S F C S H P H L V S L I G F C D E R N E M I L I Y K Y M E N G 120  
Fen E F E T E I E I I L S F C S H P H L V S L I G F C D E R N E M I L I Y D Y M E N G 120  
Lhirfen E F E T E I E I I L S F C S H P H L V S L I G F C D E R N E M I L I Y D Y M E N G 120  
LhirPtoD E F R E T E I E I L S H C S H P H L V S L I G Y C D E R N E M I L I Y D Y M E N G 120  
LhirPtoF E F E T E I E I L P R R S H P H L V S L I G Y C D D R N E M I L I Y D Y M E N G 115

Pto N L K R H L Y G S D L P T M S M S W E Q R L E I C I G A A R G L H Y L H T R A I 160  
LhirPto N L K S H L Y G S D L P - - S M S W E Q R L E I C I G A A R G L Y Y L H T R A V 158  
Fen N L K S H L Y G S D L P - - S M S W E Q R L E I C I G A A R G L H Y L H K N A V 158  
Lhirfen N L K S H L Y G S D L P T M S M S W E Q R L E I C I G A A R G L H Y L H T N G V 160  
LhirPtoD N L S K R L Y G S D L C L P T M S W E Q R L E I C I G A A R G L H Y L H N S A V 160  
LhirPtoF N L K S H L T G S D L P - - S M S W E Q R L E I C I G A A R G L L Y L H T N G V 153

Pto I H R D V K S I N I L L D E N F V P K I T D F G I S K K G T E L D Q T H L S T V 200  
LhirPto I H R D V K S I N I L L D E N F V P K I T D F G I S K K G T E L D Q T H L S T V 198  
Fen I H R D V K C T N I L L D E N F V P K I T D F G I S K T M P E L D Q T H L S T V 198  
Lhirfen I H R D V K S S N I L L D E N F V P K I T D F G I S K T M S E L D Q T H L S T A 200  
LhirPtoD I H R D V K S T N I L L D E N F V A K I T D F G I S K T M P E F D Q T H L S T M 200  
LhirPtoF I H R D V K S T N I L L D E N F V P K I T D F G L S K K G P Q L Y Q T H V S T N 193

Pto V K G T L G Y I D P E Y F I K G R L T E K S D V Y S F G V V L F E V L C A R S A 240  
LhirPto V Q G T L G Y L D P E Y F I K G R L T E K S D V Y S F G V V L F E V L C A R S A 238  
Fen V R G N I G Y I A P E Y A L W G Q L T E K S D V Y S F G V V L F E V L C A R P A 238  
Lhirfen V K G N I G Y I A P E Y A L W G Q L T E K S D V Y S F G V V L L E V L C A R P A 240  
LhirPtoD V Q G S I G Y I D P E Y F I R R Q L T K K S D V Y S F G V V L F E V L C A R P A 240  
LhirPtoF V K G T F G Y M D P E Y V I R Q K L T E K S D V Y S F G V V L F E V F C A R S T 233

Pto I V Q S L P R E M V N L A E W A V E S H N N G Q L E Q I V D P N L A D K I R P E 280  
LhirPto I V Q S L P R E M V N L A E W A V E S H N N G Q L E Q I I D P N L A D K I T P E 278  
Fen L D - - R S E I M S L D D - - E T Q K M G Q L E Q I V D P T I A A K I R P E 272  
Lhirfen L D - - L S E M M S L G D - - E T Q T M G Q L E Q I V D P T I A A K I R P E 274  
LhirPtoD I S - - R S H M I S L A E W A V E T Q K M G Q L E Q I V D P T I V A K I R P E 277  
LhirPtoF I D P Y L R R E I V T L A E W A V K S H N N G Q L E Q I V D P N L A A K I R P E 273

Pto S L R K F G D T A V K C L A L S S E D R P S M G D V L W K L E Y A L R L Q E S V 320  
LhirPto S L R K F G E T A V K C L A L S S E D R P S M G D V L W K L E Y A L R L Q E S V 318  
Fen S L R M F G E T A I K C L A P S S K N R P S M G D V L W K L E Y A L C L Q E P T 312  
Lhirfen S L R M F G E T A I K C I A P S S K N R P S M G D V L W K L E Y A L C L Q E P T 314  
LhirPtoD S L R M F G E T A V K C L A S S E N R P S M G D V L W K L E Y A L H L Q E P I 317  
LhirPtoF S L R K F G E T A V K C L A L S G K D R P S M G D V L W K L E Y A L C L Q E S V 313

Pto I 321  
LhirPto I 319  
Fen I Q D D P E 318  
Lhirfen I Q D D P E 320  
LhirPtoD I Q D N P E 323  
LhirPtoF I 314
